# Supplementary material for: Comparative Outcomes of Holmium Laser Enucleation of the Prostate (HoLEP) versus Robotic- Assisted Simple Prostatectomy (RASP) for Benign Prostatic Hyperplasia: A Systematic Review and Meta-Analysis
Source: Research Square preprint supplement (doi:10.21203/rs.3.rs-6881755/v1), 2025-06-24
Supplement: Supplementary file 1 [file 6c12c7ee118ea881820599f8.docx]

*Table 1 Data pertaining to year, type of study, including population size and evidence grading of included studies*

| *Author* | *year* | *Country* | *Study*  *period* | *PSM* | *Study design* | *No. of patients* | | *Surgicalsystem* |
| --- | --- | --- | --- | --- | --- | --- | --- | --- |
|  |  |  |  |  |  | *HoLEP* | *RASP* |  |
| *Bove* | *2023* | *Italy* | *2011-2021* | *NO* | *Retrospective* | *54* | *43* | *NA* |
| *Choudhary* | *2025* | *USA* | *2018-2022* | *1:1* | *Retrospective* | *80* | *80* | *DaVinci system* |
| *Fuschi* | *2021* | *Italy* | *2016-2018* | *NO* | *RCT* | *42* | *32* | *DaVinci system* |
| *Grosso* | *2024* | *Italy* | *2017-2022* | *1:1* | *Retrospective* | *48* | *47* | *NA* |
| *Khanmammadova* | *2024* | *USA* | *2021-2023* | *1:1* | *Retrospective* | *31* | *31* | *NA* |
| *Kim* | *2022* | *Korea* | *2018-2021* | *NO* | *Retrospective* | *26* | *33* | *DaVinci system* |
| *Lee* | *2023* | *USA* | *2013-2021* | *NO* | *Retrospective* | *209* | *65* | *DaVinci system* |
| *Palacios* | *2023* | *USA* | *2019-2022* | *1:1* | *Retrospective* | *90* | *50* | *DaVinci system* |
| *Umari* | *2017* | *Italy* | *2008-2015* | *NO* | *Retrospective* | *45* | *81* | *DaVinci system* |
| *Van der Jeugt* | *2023* | *Belgium* | *2009-2020* | *NO* | *Retrospective* | *22* | *31* | *DaVinci system* |
| *Zhang* | *2015* | *USA* | *2008-2015* | *NO* | *Retrospective* | *600* | *32* | *NA* |

*HoLEP Holmium Laser Enucleation of the Prostate, RASP Robot Assisted Simple Prostatectomy, RCT Randomized clinical trial*

*Table 2 Demographics and preoperative characteristics of included studies.*

| *Author* | *Technique* | *Patients (n)* | *Age (years)* | *BMI (kg/m²)* | *Preoperative*  *PSA (ng/mL)* | *Preoperative*  *Hb(g/dL)* | *Prostate Volume*  *(mL)* | *ASA score* | *CCI* | *Indwelling Catheter n*  *(%)* | *Follow up (months)* |
| --- | --- | --- | --- | --- | --- | --- | --- | --- | --- | --- | --- |
| *Bove 2023* | *HoLEP* | *54* | *70.0(6.1)* | *26.0(3.0)* | *5.2(3.4)* | *NA* | *102.0(21.3)* | *3–4: 8* | *NA* | *16* | *NA* |
| *RASP* | *43* | *70.2(8.4)* | *25.0(4.6)* | *6.1(4.7)* | *NA* | *106.8(26.8)* | *3–4: 9* | *NA* | *20* | *NA* |
| *Choudhary2025* | *HoLEP* | *80* | *74.6(9.2)* | *26.6(5.4)* | *6.3(3.8)* | *13.1(1.5)* | *NA* | *I:22II:42; III:16* | *NA* | *NA* | *3* |
| *RASP* | *80* | *75.3(6.0)* | *28.5(5.3)* | *5.4(2.6)* | *13.1(1.8)* | *NA* | *I:28II:42; III:10* | *NA* | *NA* | *3* |
| *Fuschi 2021* | *HoLEP* | *42* | *68.2 (6.1)* | *23.5(3.3)* | *5.6 (3.3)* | *NA* | *142.2(30.1)* | *NA* | *NA* | *11* | *24* |
| *RASP* | *32* | *69.4 (6.2)* | *20.3(3.1)* | *5.2 (2.9)* | *NA* | *149.4(35.2)* | *NA* | *NA* | *7* | *24* |
| *Grosso 2024* | *HoLEP* | *48* | *69.7(7.6)* | *26.7(1.5)* | *4.9(4.6)* | *14.4(1.7)* | *128.2(34.4)* | *3 (2–4)* | *2 (2–3)* | *20* | *21* |
| *RASP* | *47* | *67.4(6.1)* | *26.7(3.1)* | *10.7(6.1)* | *15.2(1.4)* | *129.1(30.6)* | *3 (2–3)* | *2 (2–2)* | *10* | *24* |
| *Khanmammadova 2024* | *HoLEP* | *31* | *70 (8.1)* | *26.5(3.3)* | *NA* | *NA* | *124.5(50.5)* | *NA* | *NA* | *NA* | *3* |
| *RASP* | *31* | *71 (8.2)* | *27.9(5.1)* | *NA* | *NA* | *130.1(39.6)* | *NA* | *NA* | *NA* | *3* |
| *Kim 2022* | *HoLEP* | *26* | *70.8 (7.6)* | *NA* | *5.19* | *NA* | *84.1 (31.3)* | *NA* | *NA* | *NA* | *2* |
| *RASP* | *33* | *68.1(10.1)* | *NA* | *7.17* | *NA* | *97.9 (37.9)* | *NA* | *NA* | *NA* | *2* |
| *Lee 2023* | *HoLEP* | *209* | *71.0 (2.2)* | *27.7(1.1)* | *6.9(6.3)* | *13.4 (1.9)* | *150.3(60.7)* | *II:97; III:111; V:1* | *4.0(0.5)* | *16* | *NA* |
| *RASP* | *65* | *71.7 (2.1)* | *27.1(1.3)* | *9.3(8.6)* | *13.8 (1.6)* | *145.9 57.4)* | *II:31; III;32I; V:2* | *4.9(0.6)* | *6* | *NA* |
| *Palacios 2023* | *HoLEP* | *90* | *71.6(5.3)* | *26.7(4.5)* | *6.7(4.5)* | *NA* | *126.2(37.7)* | *3 (2–3)* | *NA* | *50* | *5* |
| *RASP* | *50* | *70.0(6.1)* | *29.0(4.6)* | *9.0(6.1)* | *NA* | *173.9(73.3)* | *3 (2–3)* | *NA* | *26* | *6* |
| *Umari 2017* | *HoLEP* | *45* | *73.2(9.2)* | *26.3(3.8)* | *9.7(8.6)* | *14.3(1.4)* | *131.0(28.3)* | *NA* | *≥ 2:13* | *23* | *5* |
| *RASP* | *81* | *70.4 (7.5)* | *27.3(5.3)* | *8.1(6.4)* | *14.4 (1.1)* | *144.4(59.6)* | *NA* | *≥ 2:48* | *28* | *12* |
| *Van der Jeugt 2023* | *HoLEP* | *22* | *77.1(7.9)* | *26.0(4.3)* | *8.6 (3.1)* | *12.1(1.3)* | *211.3(15.8)* | *I:3;* *II:13;* *III:6* | *≥ 4:17* | *13* | *12* |
| *RASP* | *31* | *72.8 (9.7)* | *28.0(4.0)* | *11.6 (9.4)* | *14.1 (1.5)* | *235.6(31.0)* | *I:8;* *II:20;* *III:3* | *≥ 4:18* | *11* | *14* |
| *Zhang 2015* | *HoLEP* | *600* | *71.0 (8.0)* | *NA* | *NA* | *NA* | *NA* | *NA* | *NA* | *NA* | *NA* |
| *RASP* | *32* | *71.0 (8.0)* | *NA* | *NA* | *NA* | *NA* | *NA* | *NA* | *NA* | *NA* |

*BMI Body Mass Index, PSA Prostate Specific Antigen, ASA score American Society of Anesthesiologists score, CCI Charlson Comorbidity Index, HoLEP Holmium Laser Enucleation of the Prostate, RASP Robot Assisted Simple Prostatectomy; NA not available*

*Table 3 Perioperative and Short-term postoperative outcomes*

| *Author* | *Technique* | *Patient (n)* | *Operative time (min)* | *Estimated blood loss(mL)* | *Length of stay(days)* | *Blood transfusion(n)* | *Drop Hb (g/dL)* | *Catheterization time*  *(days)* | *Qmax(mL/sec)* | *PVR (mL)* | *IPSS* | *IPSS-QoL* | *Clavien-D<III(n)* | *Clavien-D≥ III(n)* |
| --- | --- | --- | --- | --- | --- | --- | --- | --- | --- | --- | --- | --- | --- | --- |
| *Bove 2023* | *HoLEP* | *54* | *68.6(27.4)* | *NA* | *7.0(1.5)* | *NA* | *NA* | *5.0(1.5)* | *20.6(7.6)* | *NA* | *6.4(5.3)* | *0.6(0.8)* | *NA* | *NA* |
| *RASP* | *43* | *112.1(34.5)* | *NA* | *3.4(0.8)* | *NA* | *NA* | *7.7(1.5)* | *21.1(6.9)* | *NA* | *5.4(5.4)* | *0.6(0.8)* | *NA* | *NA* |
| *Choudhary2025* | *HoLEP* | *80* | *74.4(38.7)* | *NA* | *1.4(0.8)* | *NA* | *NA* | *2.3(0.9)* | *19.7(6.0)* | *NA* | *11.7(4.5)* | *NA* | *1* | *0* |
| *RASP* | *80* | *81.5(35.1)* | *NA* | *1.6(0.8)* | *NA* | *NA* | *5(0)* | *19.6(5.6)* | *NA* | *12.3(3.8)* | *NA* | *10* | *0* |
| *Fuschi 2021* | *HoLEP* | *42* | *103.1(15.5)* | *NA* | *2.2(0.3)* | *NA* | *1.1 (0.3)* | *2.3(0.6)* | *20.0 (2.2)* | *35.5(14.9)* | *8.1(2.4)* | *1.7(0.5)* | *6* | *2* |
| *RASP* | *32* | *107.1(31.4)* | *219.4(67.5)* | *3.8(0.5)* | *NA* | *1.2 (0.3)* | *4.1(0.8)* | *19.5 (1.9)* | *31.2(16.6)* | *8.3(2.1)* | *1.7(0.6)* | *4* | *1* |
| *Grosso 2024* | *HoLEP* | *48* | *91.2(38.2)* | *NA* | *3.6(0.8)* | *0* | *1.6(0.9)* | *2.6(0.8)* | *22.9(9.9)* | *NA* | *6.0(4.6)* | *1.6(0.8)* | *NA* | *3* |
| *RASP* | *47* | *106.8(26.8)* | *NA* | *5.4(0.8)* | *2* | *2.4(1.1)* | *4.4(0.8)* | *26.9(6.9)* | *NA* | *4.6(2.3)* | *0.6(0.8)* | *NA* | *6* |
| *Khanmammadova 2024* | *HoLEP* | *31* | *139.0(34.0)* | *36.4(23.3)* | *1.4(0.8)* | *NA* | *NA* | *2.1(2.3)* | *NA* | *NA* | *NA* | *NA* | *NA* | *NA* |
| *RASP* | *31* | *128.0(23.0)* | *82.2(38.9)* | *0(0)* | *NA* | *NA* | *7.4(0.8)* | *NA* | *NA* | *NA* | *NA* | *NA* | *NA* |
| *Kim 2022* | *HoLEP* | *26* | *140.0 (76.1)* | *NA* | *2.5 (0.8)* | *0* | *0.7 (0.9)* | *1.5 (0.8)* | *NA* | *NA* | *NA* | *NA* | *NA* | *NA* |
| *RASP* | *33* | *128.6 (26.3)* | *NA* | *7.1 (1.1)* | *0* | *1.8 (1.3)* | *7.0 (0.9)* | *NA* | *NA* | *NA* | *NA* | *NA* | *NA* |
| *Lee 2023* | *HoLEP* | *209* | *84.0(42.0)* | *66.0 (27.0)* | *0.6 (1.2)* | *2* | *NA* | *0.4 (0.8)* | *NA* | *NA* | *NA* | *NA* | *NA* | *NA* |
| *RASP* | *65* | *162.0(42.0)* | *326.0 (286.0)* | *2.6 (1.9)* | *2* | *NA* | *11.2 (5.4)* | *NA* | *NA* | *NA* | *NA* | *NA* | *NA* |
| *Palacios 2023* | *HoLEP* | *90* | *193.8(48.9)* | *82.4(37.7)* | *NA* | *3* | *2.3(1.4)* | *1(0)* | *20.0(13.6)* | *16.2(27.1)* | *5.7(4.5)* | *1.4(2.3)* | *11* | *0* |
| *RASP* | *50* | *174.8(45.8)* | *126.5(95.4)* | *NA* | *0* | *1.6(1.0)* | *5.3(3.1)* | *21.8(8.4)* | *7.1(15.3)* | *4.8(5.3)* | *0.6(0.8)* | *4* | *1* |
| *Umari 2017* | *HoLEP* | *45* | *110.3(34.4)* | *NA* | *2 .0(0)* | *0* | *NA* | *2 (0)* | *22.5(16.1)* | *NA* | *6.2 (10.0)* | *NA* | *9* | *3* |
| *RASP* | *81* | *113.8(49.0)* | *NA* | *4.0 (1.5)* | *1* | *NA* | *3 (1.5)* | *23.0(10.5)* | *NA* | *5.0 (4.5)* | *NA* | *17* | *8* |
| *Van der Jeugt2023* | *HoLEP* | *22* | *134.2 (23.7)* | *NA* | *3.3 (2.3)* | *0* | *1.0 (0.7)* | *3.0 (2.3)* | *23.7 (9.5)* | *10.0(22.1)* | *7.1 (3.5)* | *1.3 (0.7)* | *10* | *2* |
| *RASP* | *31* | *142.1 (29.5)* | *489.0* *(349.7)* | *5.0 (2.3)* | *0* | *1.3 (1.7)* | *3 (1.5)* | *19.0 (7.6)* | *26.3(51.2)* | *5.8 (1.9)* | *1.6 (0.7)* | *9* | *3* |
| *Zhang 2015* | *HoLEP* | *600* | *103.0 (47.0)* | *NA* | *1.3 (1.0)* | *11* | *1.8 (1.3)* | *0.7 (0.4)* | *NA* | *NA* | *NA* | *NA* | *NA* | *7* |
| *RASP* | *32* | *274.0 (49.0)* | *NA* | *2.3 (2.3)* | *3* | *2.5 (1.1)* | *8.0 (2.0)* | *NA* | *NA* | *NA* | *NA* | *NA* | *1* |

*RASP robot-assisted simple prostatectomy; HoLEP holmium laser enucleation of the prostate; PVR post-void residual volume; Hb hemoglobin; IPSS International Prostate Symptom Score; PSA prostate-specific antigen; Qmax maximum flow rate; IPSS-QoL International Prostatic Symptom Score – Quality of Life; SD standard deviation Function; NA not available*

*Table 4 Meta-analysis of baselines characteristics.*

| *Variable* | *included studies* | *WMD/OR* | *95% CI* | *p value* |
| --- | --- | --- | --- | --- |
| *Age (years)* | *11* | *0.49* | *(-0.53, 1.51）* | *0.35* |
| *BMI (kg/m²)* | *9* | *-0.29* | *(-1.28, 0.70)* | *0.56* |
| *Preoperative PSA (ng/mL)* | *8* | *-1.31* | *(-2.93, 0.31)* | *0.11* |
| *Preoperative Hb (g/dL)* | *5* | *-0.61* | *(-1.19, -0.03)* | *0.04* |
| *Prostate Volume (mL)* | *9* | *-11.6* | *(-20.19, -3.00)* | *0.008* |
| *Indwelling Catheter (n)* | *7* | *1.32* | *(0.83, 2.09)* | *0.24* |

*Table 5 Study quality of case–control studies based on the Newcastle–Ottawa scale*

|  |  | *Selection* | | | | *Comparability* | *Outcome* | | | *Overall score* |
| --- | --- | --- | --- | --- | --- | --- | --- | --- | --- | --- |
| *Author* | *Study design* | *1* | *2* | *3* | *4* | *5* | *6* | *7* | *8* |  |
| *Bove 2023* | *Retrospective* |  | *☆* | *☆* | *☆* | *☆* | *☆* | *☆* | *☆* | *7* |
| *Choudhary 2025* | *Retrospective* |  | *☆* | *☆* | *☆* | *☆* |  | *☆* | *☆* | *6* |
| *Grosso 2024* | *Retrospective* | *☆* | *☆* | *☆* | *☆* | *☆* | *☆* | *☆* | *☆* | *8* |
| *Khanmammadova 2024* | *Retrospective* | *☆* | *☆* | *☆* | *☆* | *☆* |  | *☆* | *☆* | *7* |
| *Kim 2022* | *Retrospective* |  | *☆* | *☆* | *☆* | *☆* | *☆* | *☆* | *☆* | *7* |
| *Lee 2023* | *Retrospective* |  | *☆* | *☆* | *☆* | *☆* | *☆* | *☆* | *☆* | *7* |
| *Palacios 2023* | *Retrospective* | *☆* | *☆* | *☆* | *☆* | *☆* | *☆* | *☆* | *☆* | *8* |
| *Umari 2017* | *Retrospective* |  | *☆* | *☆* | *☆* | *☆* | *☆* | *☆* | *☆* | *7* |
| *Van der Jeugt 2023* | *Retrospective* | *☆* | *☆* | *☆* | *☆* | *☆* | *☆* | *☆* | *☆* | *8* |
| *Zhang 2015* | *Retrospective* |  | *☆* | *☆* | *☆* | *☆* | *☆* |  | *☆* | *6* |

*1: Representativeness of the study's exposed population 2: Criteria for selecting the unexposed control group 3: Methodological approach for exposure evaluation 4: Verification of absent outcome at baseline assessment 5: Inter-group comparability through study design/analytical adjustments 6: Outcome verification procedures 7: Follow-up duration adequacy relative to outcome development 8: Completeness of cohort tracking during follow-up*
